# Supplementary material for: Renal and Cardiovascular Effects of sodium–glucose cotransporter 2 (SGLT2) inhibition in combination with loop Diuretics in diabetic patients with Chronic Heart Failure (RECEDE-CHF): protocol for a randomised controlled double-blind cross-over trial
Source: PubMed Central journal article supplement (PMC5652490; doi:10.1136/bmjopen-2017-018097), 2017-10-16
Supplement: bmjopen-2017-018097.reviewer_comments.pdf [file bmjopen-2017-018097.reviewer_comments.pdf]

## PEER REVIEW HISTORY

BMJ Open publishes all reviews undertaken for accepted manuscripts. Reviewers are asked to complete a checklist review form (<http://bmjopen.bmj.com/site/about/resources/checklist.pdf>) and are provided with free text boxes to elaborate on their assessment. These free text comments are reproduced below.

## ARTICLE DETAILS

|                            |                                                                                                                                                                                                                                                               |
|----------------------------|---------------------------------------------------------------------------------------------------------------------------------------------------------------------------------------------------------------------------------------------------------------|
| <b>TITLE (PROVISIONAL)</b> | The Renal and Cardiovascular Effect of Sodium-Glucose co-Transporter 2 (SGLT2) inhibition in combination with Loop Diuretics in Diabetic patients with Chronic Heart Failure (RECEDE-CHF): Protocol for a Randomised Controlled Double-Blind Crossover Trial. |
| <b>AUTHORS</b>             | Mordi, Natalie; Mordi, Ify; Singh, Jagdeep; Baig, Fatima; Choy, Anna-Maria; McCrimmon, Rory; Struthers, Allan; Lang, Chim C.                                                                                                                                  |

This article was not externally reviewed at BMJ Open. Protocols that have been independently assessed prior to submission to BMJ Open are usually fast-tracked to publication on the grounds that further substantial changes will not be possible. This independent assessment will usually be external, independent review for both a substantial grant award from a non-commercial or government funder and ethics approval.
